# Supplementary material for: Sex-specific lipid molecular signatures in obesity-associated metabolic dysfunctions revealed by lipidomic characterization in ob/ob mouse
Source: PubMed Central journal article supplement (PMC6390380; doi:10.1186/s13293-019-0225-y), 2019-02-26

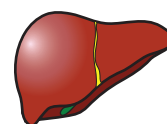

LIVER

A. Fatty acids

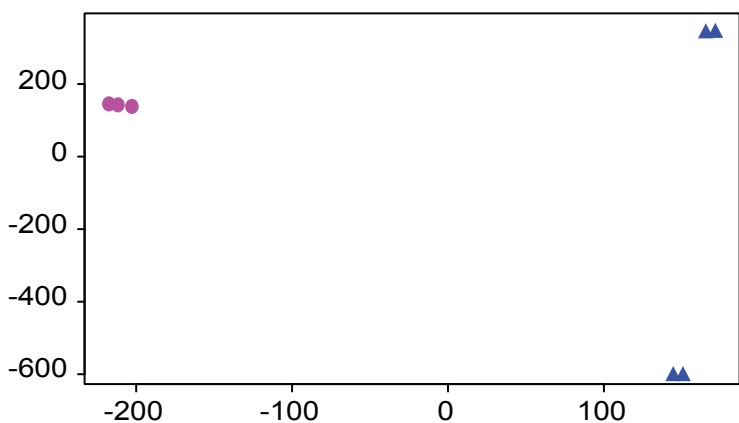

B. Phospholipid Species

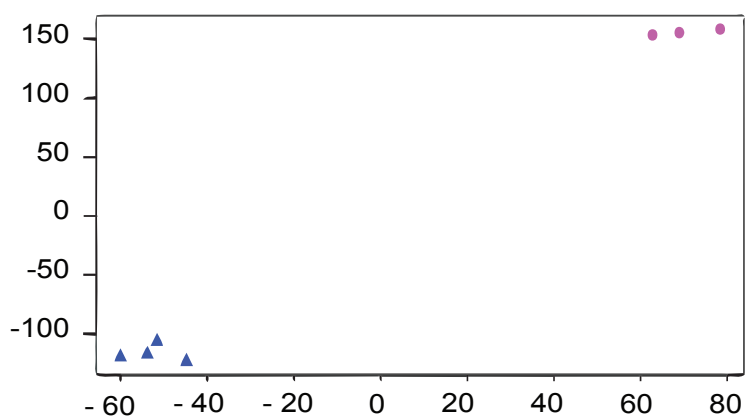

C. PC Species

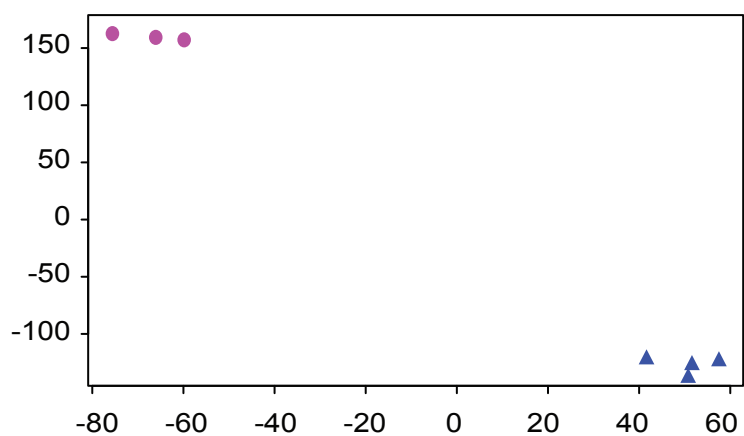

LPC Species

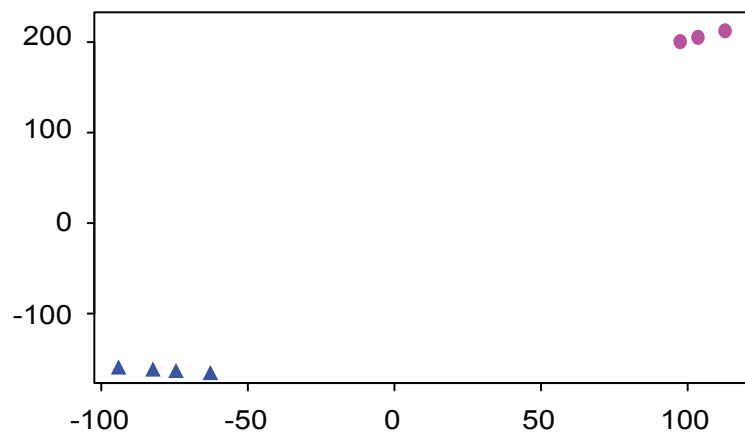

D. PE Species

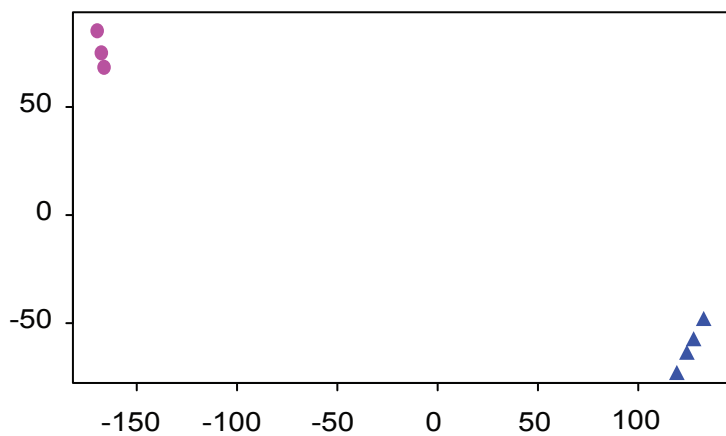

LPE Species

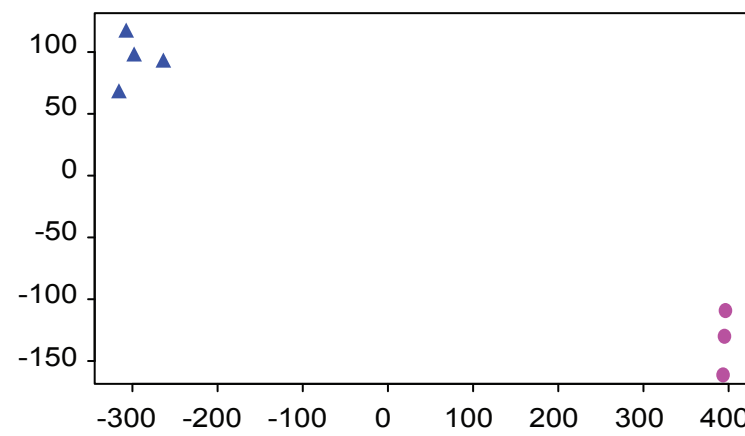

Supplement: 13293_2019_225_MOESM3_ESM.pdf [file 13293_2019_225_MOESM3_ESM.pdf]
