# Supplementary material for: Sex-specific lipid molecular signatures in obesity-associated metabolic dysfunctions revealed by lipidomic characterization in ob/ob mouse
Source: PubMed Central journal article supplement (PMC6390380; doi:10.1186/s13293-019-0225-y), 2019-02-26
Supplement: 13293_2019_225_MOESM4_ESM.pdf [file 13293_2019_225_MOESM4_ESM.pdf]

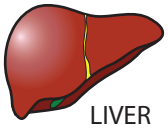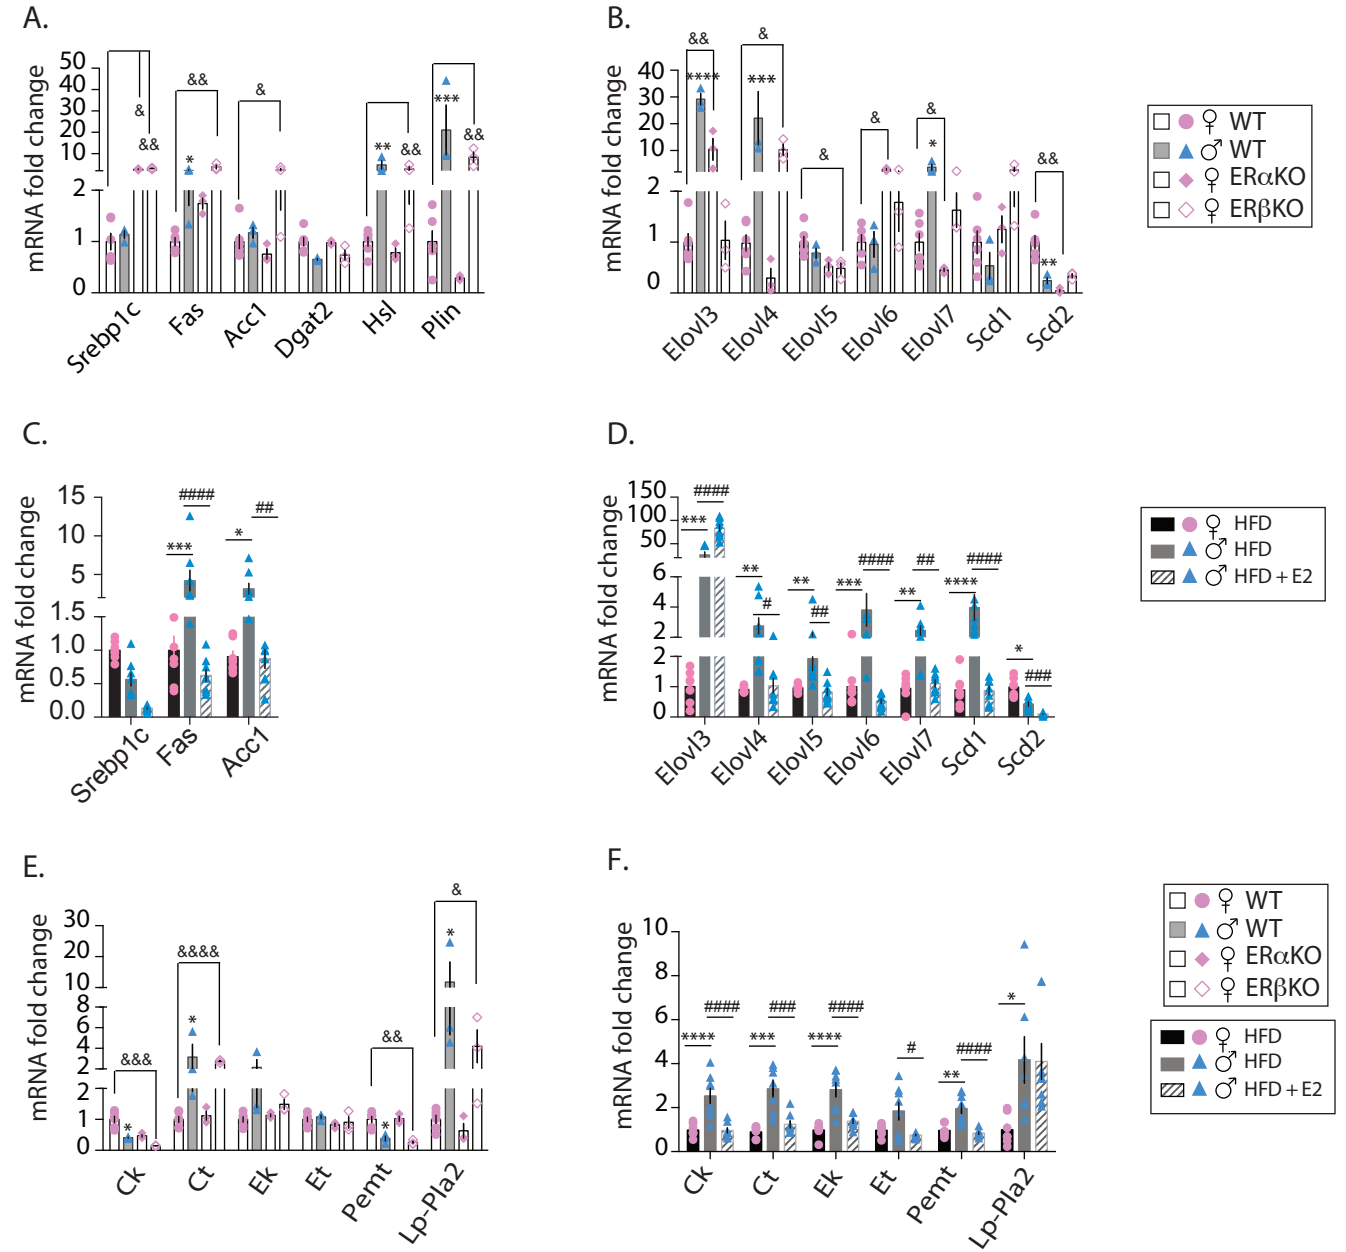

Suppl. Figure S4
